# Supplementary material for: Quality Improvement of Tomato Fruits by Preharvest Application of Chitosan Oligosaccharide
Source: MDPI journal article supplement (doi:10.3390/horticulturae9030300), 2023-02-22
Supplement: s1 [file s1]

Archive with 3 entries (3 files):
- Figure S1.pdf
- Table S1.pdf
- Table S2.pdf
