# Supplementary material for: Quality Improvement of Tomato Fruits by Preharvest Application of Chitosan Oligosaccharide
Source: MDPI journal article supplement (doi:10.3390/horticulturae9030300), 2023-02-22
Supplement: s1 [file s1 › Figure S1.pdf]

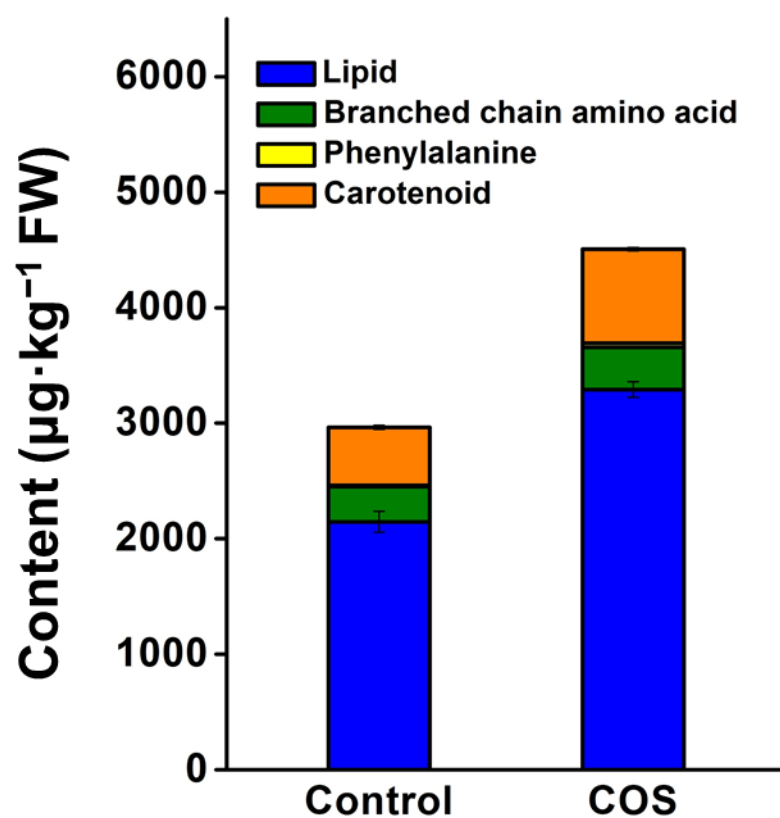

**Figure S1** Changes of volatiles derived from various pathways in response to chitosan oligosaccharide treatment in ripe tomato fruits. Data are expressed as means  $\pm$  SD of three biological replicates. FW: fresh weight.
