# Supplementary material for: Quality Improvement of Tomato Fruits by Preharvest Application of Chitosan Oligosaccharide
Source: MDPI journal article supplement (doi:10.3390/horticulturae9030300), 2023-02-22
Supplement: s1 [file s1 › Table S1.pdf]

**Table S1** Primers used for RT-qPCR

| Gene name      | Forward (5'-3')           | Reverse (5'-3')             |
|----------------|---------------------------|-----------------------------|
| <i>SIACS2</i>  | TGTTAGCGTATGTATTGACAACTGG | TCATAACATAACTTCACTTTTGCATTC |
| <i>SIACS4</i>  | CTCCTCAAATGGGGAGTACG      | TTTTGTTTGCTCGCACTACG        |
| <i>SIACO1</i>  | GCCAAAGAGCCAAGATTTGA      | TTTTTAATTGAATTGGGATCTAAGC   |
| <i>SIETR3</i>  | TGCTGTTCGTGTACCGCTTT      | TCATCGGGAGAACCAGAACC        |
| <i>SIPG2a</i>  | AACGGACCACAATCTTGAC       | CTGCTCGGAGTCTGAACC          |
| <i>SIPSY1</i>  | AACTTGTTGATGGCCCAAAC      | CTGTATCGGACAAAGCACCA        |
| <i>SIACTIN</i> | CCTCAGCACATTCCAGCAG       | CCACCAAACTTCTCCATCCC        |
