# Supplementary material for: Quality Improvement of Tomato Fruits by Preharvest Application of Chitosan Oligosaccharide
Source: MDPI journal article supplement (doi:10.3390/horticulturae9030300), 2023-02-22
Supplement: s1 [file s1 › Table S2.pdf]

**Table S2 Effect of chitosan oligosaccharide on tomato fruit size**

| <b>Treatment</b> | <b>Transverse diameter (cm)</b> | <b>Vertical diameter (cm)</b> |
|------------------|---------------------------------|-------------------------------|
| <b>Control</b>   | 6.76±0.12                       | 5.35±0.12                     |
| <b>COS</b>       | 6.78±0.13                       | 5.23±0.10                     |

Data represent the means ± SD of six ripe tomato fruits.
